# Supplementary material
Source: Springer Nature journal article supplement (https://www.springermedizin.de/resource/supplementary/13643_2013_142_MOESM1_ESM.pdf/9681582)
Supplement: MOESM1 [file 9681582]

**Search neoplasms** - “neoplasms”[Mesh] OR metastas\*[tiab] OR neoplas\*[tiab] OR tumour\*[tiab] OR cancer\*[tiab] OR tumor[tiab] OR tumora\*[tiab] OR tumorb\*[tiab] OR tumorc\*[tiab] OR tumord\*[tiab] OR tumore\*[tiab] OR tumorf\*[tiab] OR tumorg\*[tiab] OR tumorh\*[tiab] OR tumori\*[tiab] OR tumork\*[tiab] OR tumorl\*[tiab] OR tumorm\*[tiab] OR tumorn\*[tiab] OR tumoro\*[tiab] OR tumorp\*[tiab] OR tumorr\*[tiab] OR tumors\*[tiab] OR tumort\*[tiab] OR tumoru\*[tiab] OR tumorv\*[tiab] OR tumorw\*[tiab] OR tumorx\*[tiab] OR tumory\*[tiab] OR tumorz\*[tiab] OR tumor’\*[tiab] OR tumor1[tiab]

**Search exercise therapy** - “exercise therapy”[Mesh] OR exercise therap\*[tiab] OR “physical education and training” [Mesh] “physical education”[tiab] OR “physical Fitness”[Mesh] OR “physical fitness”[tiab] OR “walking”[Mesh] OR “walking”[tiab] OR kinesiotherap\*[tiab] OR “walking training”[tiab] OR “exercise treatment”[tiab] OR therapeutic exercis\*[tiab] OR “calisthenics”[tiab] OR gymnastic\*[tiab]

**Search psychosocial therapy** - “Social Support”[Mesh] OR “Behavior Therapy”[Mesh] OR “cognitive therapy”[Mesh] OR “Mind-body therapies”[Mesh] OR “relaxation therapy”[Mesh] OR “counseling”[Mesh] OR “biofeedback, psychology”[Mesh] OR “guideline adherence”[Mesh] OR “patient compliance”[Mesh] OR “patient education as topic”[Mesh] OR “Health promotion”[Mesh] OR “Health education”[Mesh] OR “health behavior”[Mesh] OR “Reinforcement (Psychology)”[Mesh] OR “social support”[tiab] OR “Behavior therapy”[tiab] OR “cognitive therapy”[tiab] OR “Mind-body therapies”[tiab] OR counselor\*[tiab] OR “psychology biofeedback”[tiab] OR “guideline adherence”[tiab] OR “patient compliance”[tiab] OR “patient education as topic”[tiab] OR “Health promotion”[tiab] OR “Health education”[tiab] OR “health behavior”[tiab] OR “Reinforcement (Psychology)”[tiab] OR alternative therap\*[tiab] OR “Psychophysiology”[tiab] OR “behavior training”[tiab] OR “behavior treatment”[tiab] OR “desensitization”[tiab] OR “CBT”[tiab] OR cognitive behavior therap\*[tiab] OR cognitive behavior treatment\*[tiab] OR cognitive behavioral therap\*[tiab] OR cognitive behavioral treatment\*[tiab] OR cognitive behaviour therap\*[tiab] OR cognitive behavioural treatment\*[tiab] OR cognitive behavioural therap\*[tiab] OR cognitive behavioural treatment\*[tiab] OR “anthroposophy”[tiab] OR “complementary medicine”[tiab] OR complementary therap\*[tiab] OR mind-body relation\*[tiab] OR mind-body therap\*[tiab] OR mind body techniq\*[tiab] OR mind body therap\*[tiab] OR “naturopathy orthomolecular medicine”[tiab] OR polarity thera\*[tiab] OR reflexotherap\*[tiab] OR spiritual therap\*[tiab] OR “mind-body and relaxation techniques”[tiab] relaxation therap\*[tiab] OR client centered therap\*[tiab] OR nondirective therap\*[tiab] OR “biofeedback (psychology)”[tiab] OR psychoneuroimmunolog\*[tiab] OR psychophysiologic respons\*[tiab] OR “patient adherence”[tiab] OR “treatment compliance”[tiab] OR health behav\*[tiab] OR health promoting behav\*[tiab] OR health related behav\*[tiab] OR “conditioning”[tiab] OR “differential reinforcement”[tiab] OR “knowledge of results (psychology)”[tiab]

**Search quality of life** - “quality of life”[Mesh] OR “quality of life”[tiab] OR “QoL”[tiab] OR “Health related quality of life”[tiab] OR “HRQL”[tiab] OR “life quality”[tiab]

**Search RCT** - “randomized controlled trial”[pt] OR “controlled clinical trial”[pt] OR “randomized controlled trials”[mh] OR “random allocation” [mh] OR “double-blind method” [mh] OR “single-blind method” [mh] OR “clinical trial” [pt] OR “clinical trials” [mh] OR "clinical trial" [tw] OR ((singl\* [tw] OR doubl\* [tw] OR treb\* [tw] OR tripl\* [tw])) AND (mask\* [tw] OR blind\* [tw])) OR "latin square" [tw] OR placebos [mh] OR placebo\* [tw] OR random\* [tw] OR research design [mh:noexp] OR comparative study [pt] OR evaluation studies [pt] OR follow-up studies [mh] OR prospective studies [mh] OR cross-over studies [mh] OR control[tw] OR controll\*[tw] OR prospectiv\* [tw] OR volunteer\* [tw] NOT (animal [mh] NOT human [mh])

**Search Adult** - (("Adolescent"[Mesh] OR "Child"[Mesh] OR "Infant"[Mesh] OR adolescen\*[tiab] OR child\*[tiab] OR schoolchild\*[tiab] OR infant\*[tiab] OR girl\*[tiab] OR boy\*[tiab] OR teen[tiab] OR teens[tiab] OR teenager\*[tiab] OR youth\*[tiab] OR pediatr\*[tiab] OR paediatr\*[tiab] OR puber\*[tiab]) NOT ("Adult"[Mesh] OR adult\*[tiab] OR man[tiab] OR men[tiab] OR woman[tiab] OR women[tiab]))
